# Supplementary material
Source: PubMed Central journal article supplement (PMC2717306)
Supplement: mmc1.pdf [file mmc1.pdf]

Biophysical Journal, Volume 96

**Supporting Material**

**Simultaneous measurements of solvent dynamics and functional kinetics in a light-activated enzyme.**

Guillaume Durin, Aude Delaunay, Claudine Darnault, Derren J. Heyes, Antoine Royant, Xavier Vernede, C. Neil Hunter, Martin Weik, and Dominique Bourgeois

**Table S1.**

Thermodynamic parameters extracted from TDAM data of Fig.3 and 4a.

|                                             | $S_{25-1}$ | $S_{25-2}$ | $S_{40-1}$              | $(S_{25-1} + S_{25-4})^{\&}$ |
|---------------------------------------------|------------|------------|-------------------------|------------------------------|
| $v_1$ [ $s^{-1}$ ] <sup>*</sup>             | 24.1       | 65.3       | 155.2                   | 63                           |
| $\Delta H_1$ [ $kJ.mol^{-1}$ ] <sup>%</sup> | 14.15      | 15.51      | 16.59                   | 15.38                        |
| $v_2$ [ $s^{-1}$ ]                          | 3.19e+16   | 6.85e+16   | 1.15e+12 <sup>\\$</sup> | -                            |
| $\Delta H_2$ [ $kJ.mol^{-1}$ ]              | 73.7       | 76.2       | 55.5 <sup>\\$</sup>     | -                            |
| $v_{VTF}$ [ $s^{-1}$ ]                      | 1.54e+09   | 2.50e+09   | 1.07e+08 <sup>\\$</sup> | -                            |
| $E_{VTF}$ [ $kJ.mol^{-1}$ ]                 | 27.7       | 27.1       | 28.6 <sup>\\$</sup>     | -                            |
| $T_{VTF}$ [K]                               | 75.9       | 82.7       | 54.0 <sup>\\$</sup>     | -                            |

\* For a photo-activated process,  $v_1$  is proportional to the intensity of the actinic light.

% The value of  $\Delta H_1$  reported in the text corresponds to the average between the three samples  $S_{25-1}$ ,  $S_{25-2}$  and  $S_{40-1}$ .

& Parameters obtained from global fitting to both data sets  $S_{25-1}$  ( $G = 100$  K/hour) and  $S_{25-4}$  ( $G = 150$  K/hour).

\\$ Parameters considered less reliable due to the extended rate distribution in  $S_{40-1}$  possibly caused by solvent de-mixing.

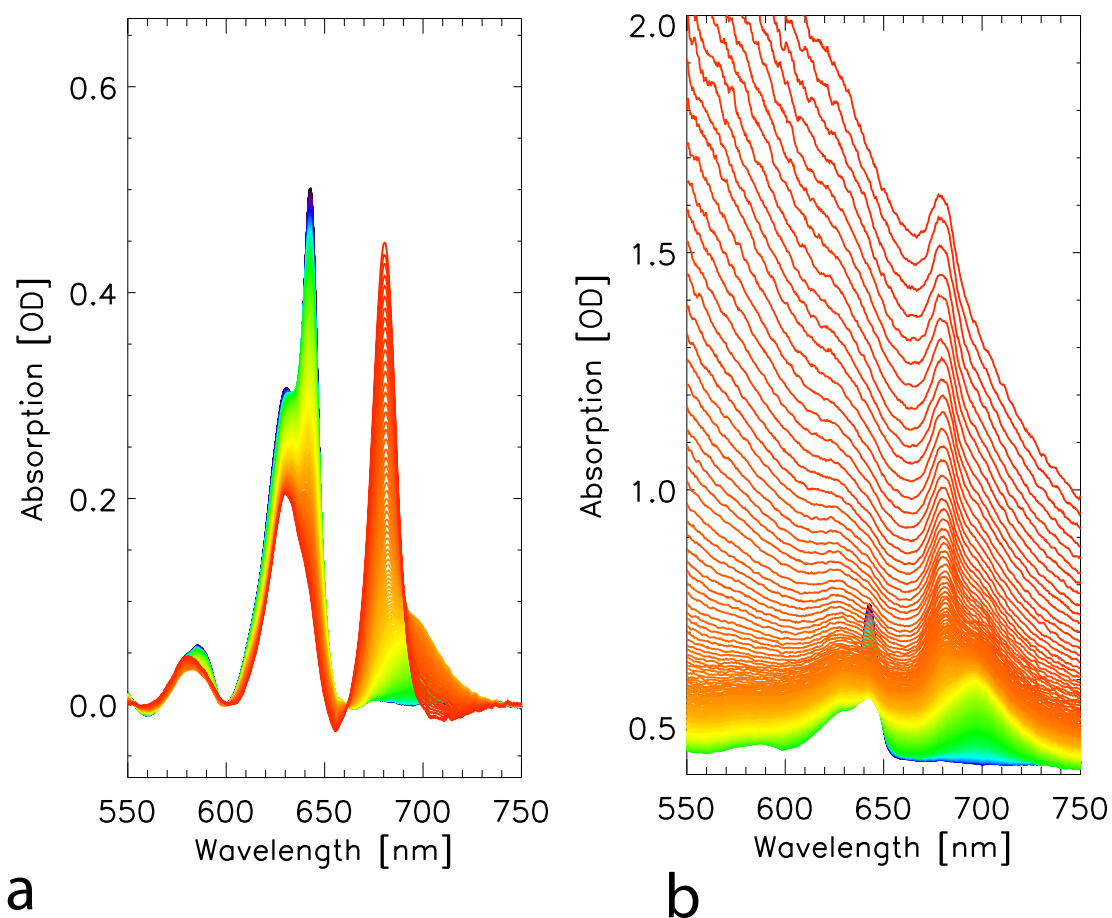

Fig. S1: Spectroscopic “movie” of the POR reaction pathway in TDAM mode. (a) Absorption spectra evolve from blue to red as the temperature increases at a rate of 100 K/hour. (b) Raw TDAM data showing the temperature-dependant baseline increase associated with light scattering from developing ice clusters.

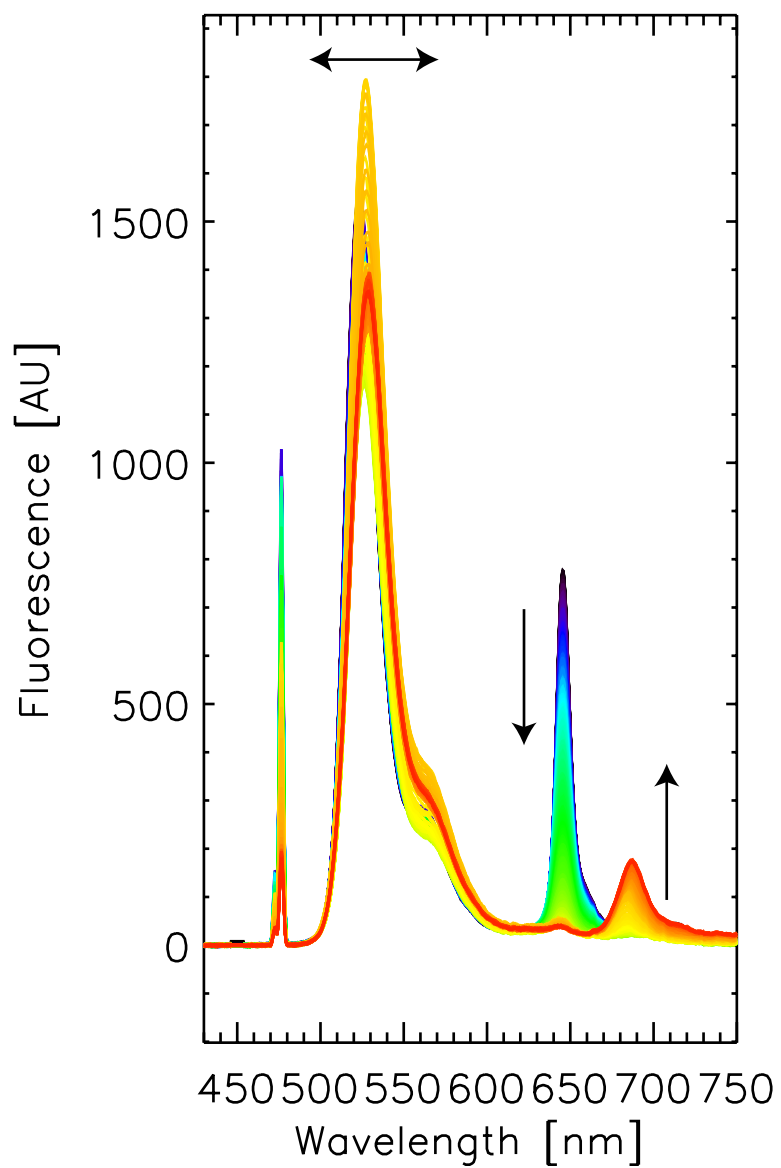

Fig. S2: Spectroscopic “movie” of the POR reaction pathway in TDFM mode. The evolution of the fluorescence emission of Oregon Green (horizontal arrow) can be seen in parallel with the POR catalytic cycle (vertical arrows).

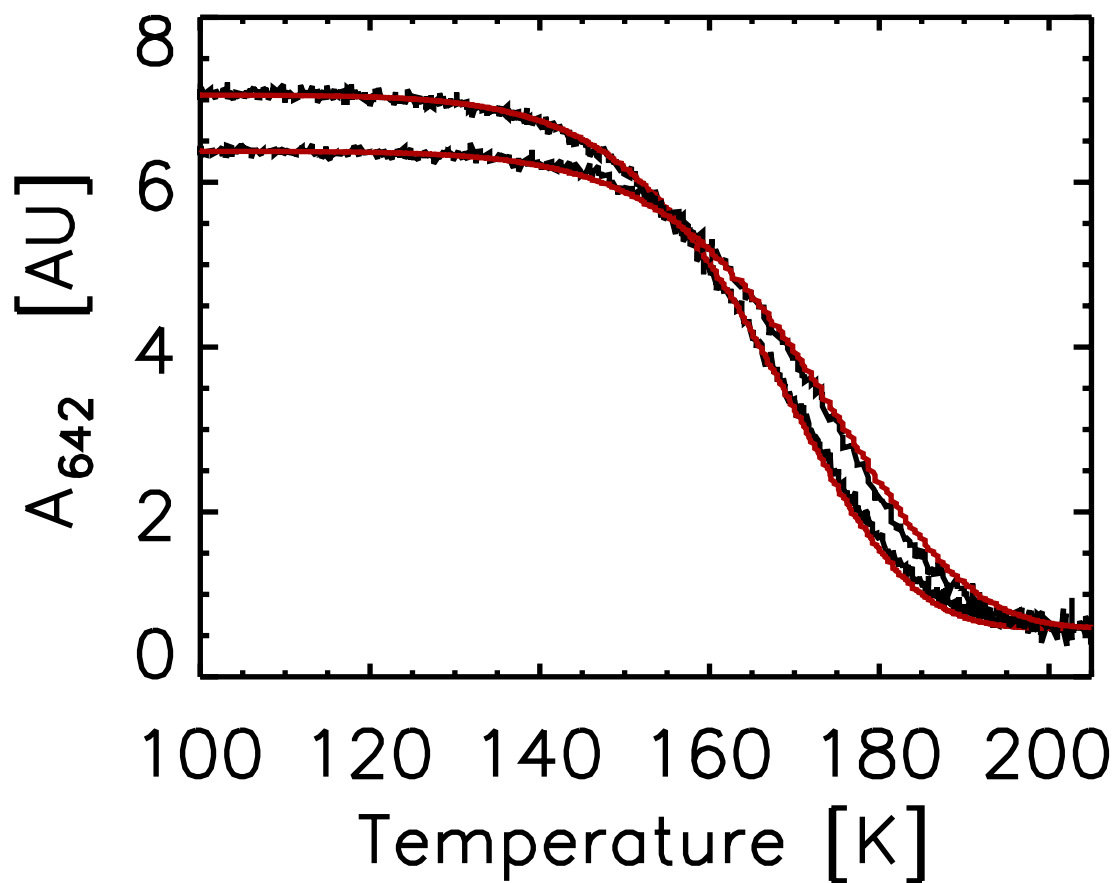

Fig. S3: Global fit of the  $A_{642}$  decay from two data sets recorded with different temperature ramps (100 K/hour, and 150 K/hour).

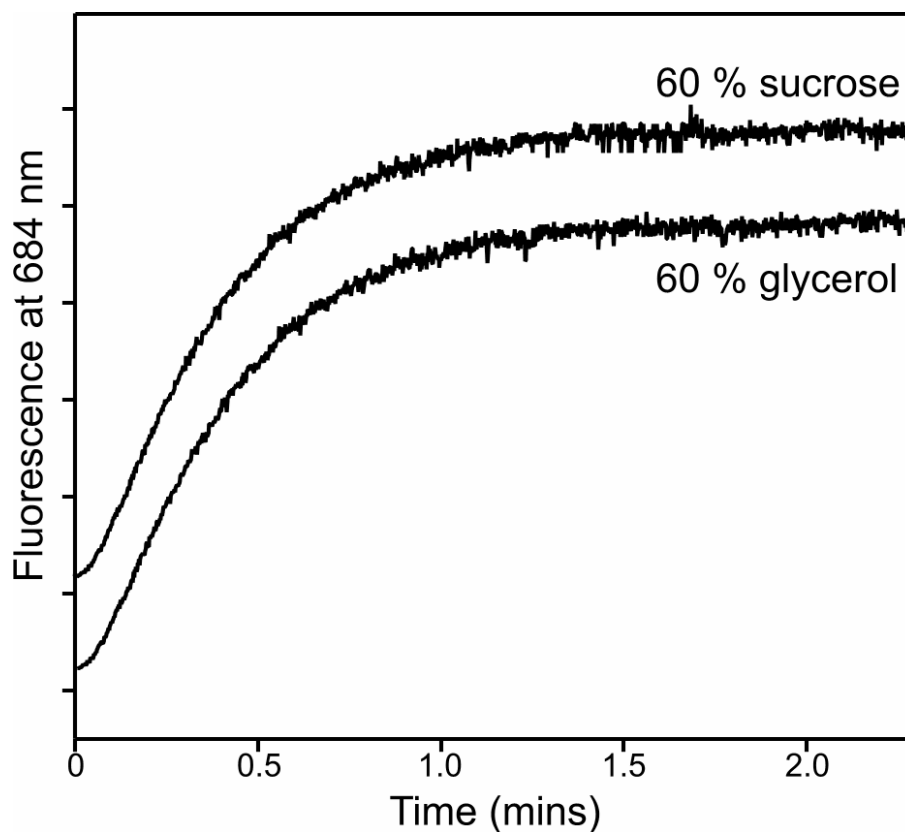

Fig. S4: Kinetics of the 2<sup>nd</sup> step of the POR reaction measured in 60 % glycerol and 60 % sucrose solutions. The rate of increase in fluorescence at 684 nm was measured at 230 K as previously described (ref 26) for samples containing 1.2  $\mu\text{M}$  PChlide, 30  $\mu\text{M}$  POR and 200  $\mu\text{M}$  NADPH, using either 60 % glycerol or 60 % sucrose as a cryogenic buffer. The traces are offset for ease of clarification. Similar rates are observed for both cryogenic buffers ( $0.035 \pm 0.003 \text{ s}^{-1}$  for 60 % glycerol and  $0.039 \pm 0.004 \text{ s}^{-1}$  for 60 % sucrose), indicating that this step is not influenced by the nature of the viscogen.
